# Supplementary material for: Synthesis of Mixed Actinide Oxides Using Microwave Radiation
Source: MDPI journal article supplement (doi:10.3390/en15186618), 2022-09-09
Supplement: s1 [file s1]

## Supplementary Materials

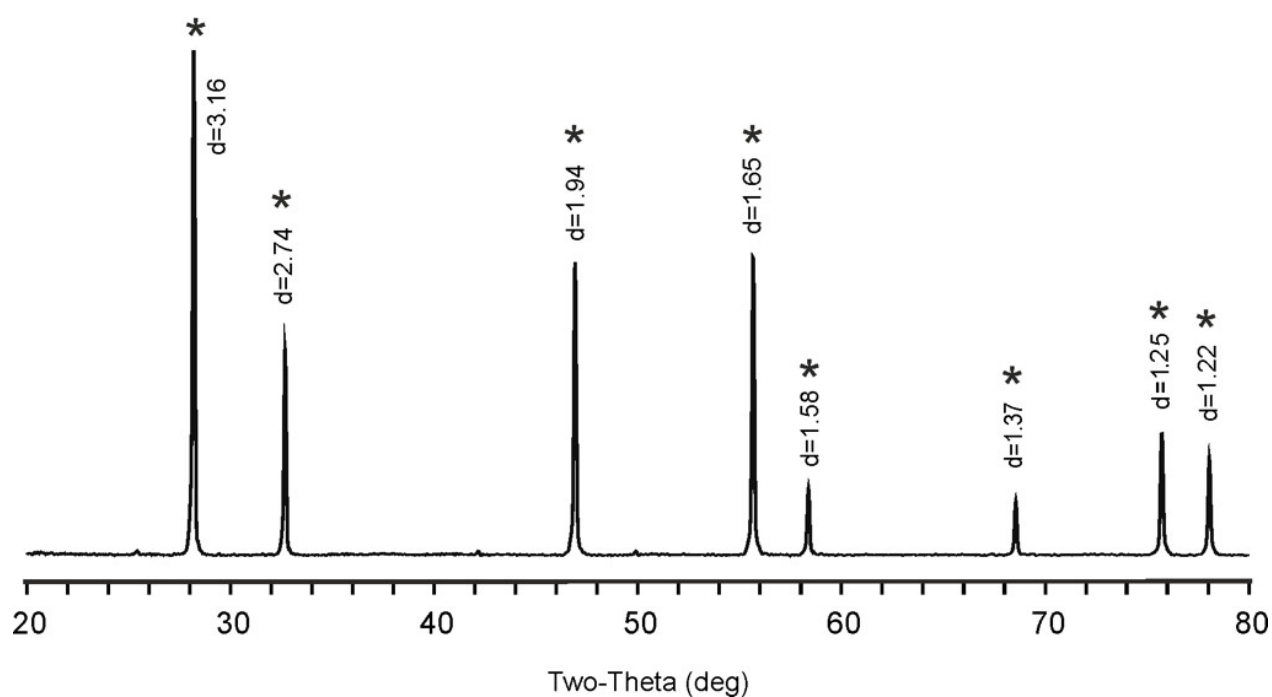

**Figure S1.** Diffractogram of (U,Ce)O<sub>2</sub> powder obtained by microwave denitration of 10% wt. Ce solution (\* - Uraninite, UO<sub>2</sub>, #65-0285 in PDF-2)

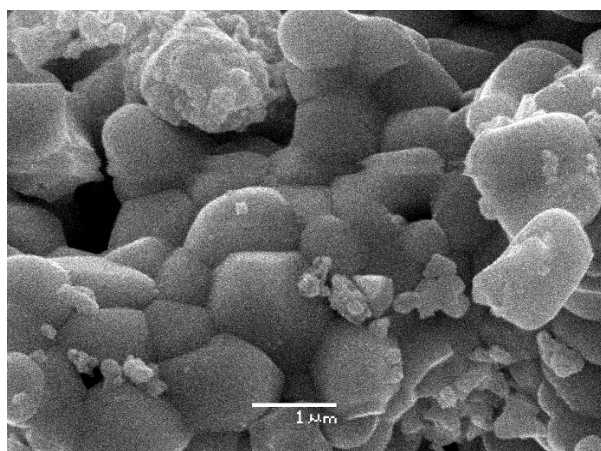

(a)

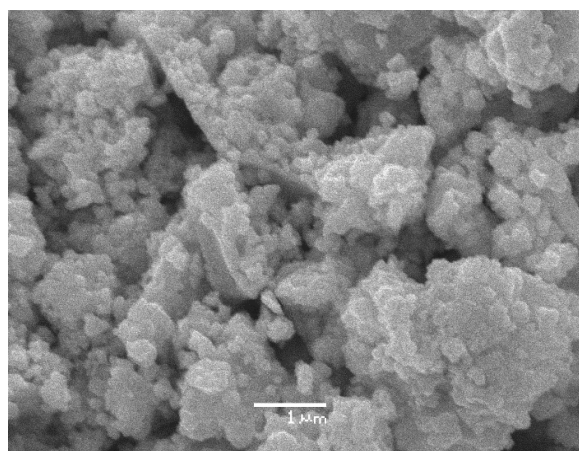

(b)

**Figure S2.** SEM images of the (U,Ce)O<sub>2</sub> powders obtained by microwave radiation with power of 800 W (a) and 180 W (b).
